# Supplementary material for: Synthesis of ultrathin PtPdBi nanowire and its enhanced catalytic activity towards p-nitrophenol reduction
Source: Royal Society of Chemistry journal article supplement (doi:10.1039/c3ta14502f), 2013-11-26
Supplement: c3ta14502f.pdf [file c3ta14502f.pdf]

## Supporting Information

### Synthesis of ultrathin PtPdBi nanowire and its enhanced catalytic activity towards *p*-nitrophenol reduction

Yan-Yan Shen, Yue Sun, Lin-Nan Zhou, Yong-Jun Li\* and Edward S. Yeung

*State Key Lab of Chemo/Biosensing and Chemometrics, School of Chemistry and Chemical Engineering, Hunan University, Changsha 410082, China*

#### Synthesis of Pt and Pd nanoparticles

Typically, 55 mg of PVP was dissolved into 9.4 mL of ethylene glycol and heated to 170°C under a flow of argon gas. Subsequently, 1.0 mL of ethylene glycol containing 32.0 mg of Na<sub>2</sub>PtCl<sub>4</sub>·3H<sub>2</sub>O was injected rapidly. The reaction solution was kept at 170°C under magnetic stirring for 15 min before being cooled to room temperature.

Typically, 27.5 mg of PVP was dissolved into 9.4 mL of ethylene glycol and heated to 170°C under a flow of argon gas. Subsequently, the mixture of 3.662 mL of 0.01 mol/L H<sub>2</sub>PdCl<sub>4</sub> aqueous solution was injected rapidly. The reaction solution was kept at 170°C under magnetic stirring for 30 min before being cooled to room temperature.

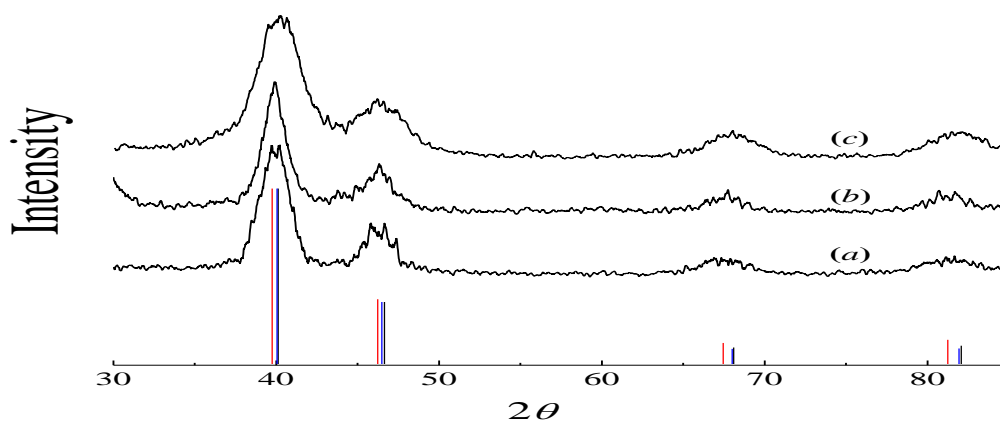

Figure S1. XRD patterns of (a) Pt<sub>93</sub>Bi<sub>7</sub> NWs, (b) Pd<sub>92</sub>Bi<sub>8</sub> NWs, and (c) Pt<sub>59</sub>Pd<sub>41</sub> NPs. The red lines are the XRD peaks of Pt (JCPDF Card File 04-0802), the black lines are the XRD peaks of Pd (JCPDF Card File 46-1043), and the blue lines are the XRD peaks of PtPd (JCPDF Card File 65-6418).

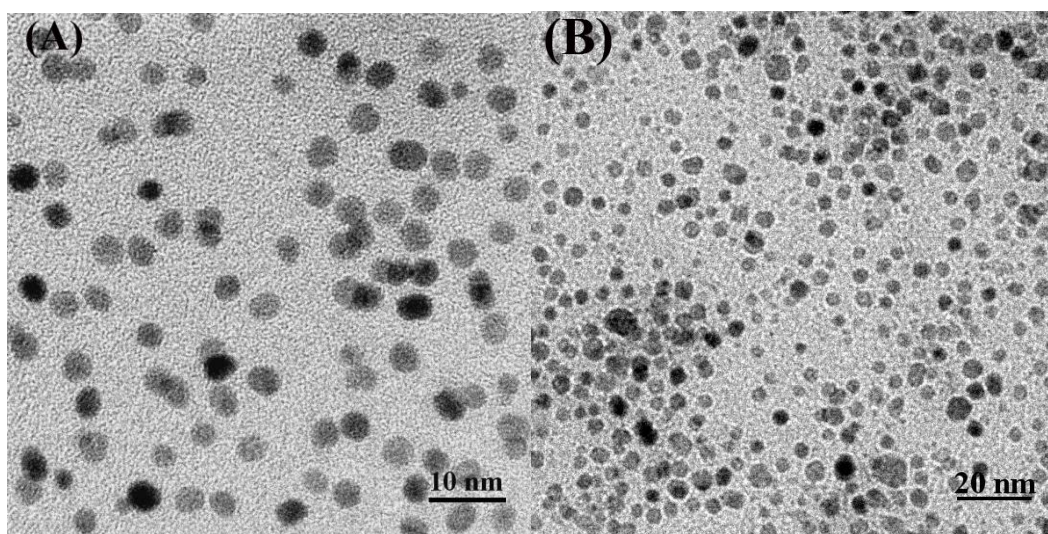

Figure S2. TEM images of Pt (A) and Pd (B) nanoparticles.

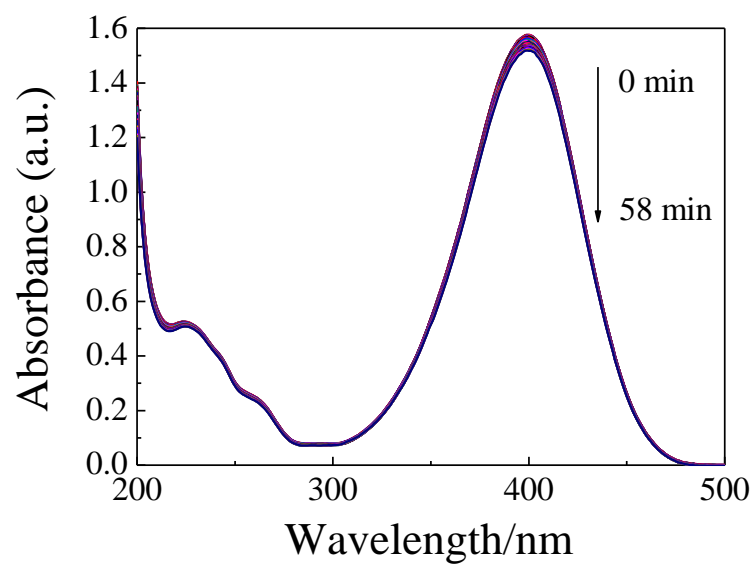

Figure S3. UV-vis spectra of the conversion from *p*-nitrophenol to *p*-aminophenol over one hour without adding any metal catalyst.

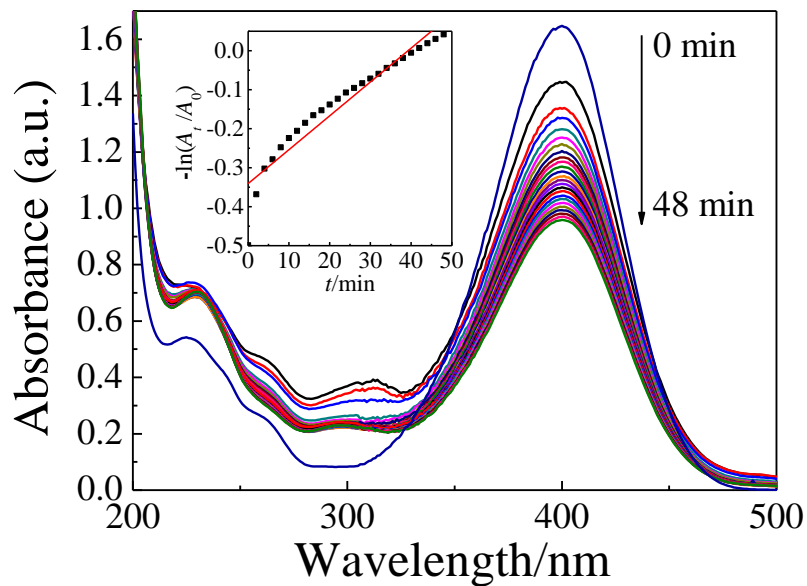

Figure S4. Successive absorption spectra of the conversion from *p*-nitrophenol to *p*-aminophenol with Pt<sub>58</sub>Pd<sub>42</sub> catalysts. Inset was plot of  $-\ln(A_t/A_0)$  versus  $t$ .
